# Supplementary material for: Lattice-contraction triggered synchronous electrochromic actuator
Source: PubMed Central journal article supplement (PMC6237766; doi:10.1038/s41467-018-07241-7), 2018-11-15
Supplement: 41467_2018_7241_MOESM3_ESM.pdf [file 41467_2018_7241_MOESM3_ESM.pdf]

### **Description of Additional Supplementary Files**

File Name: Supplementary Movie 1

Description: The dual-responsive film showed great synchronism and excellent electrochromic and actuating performances in 1 M LiClO<sub>4</sub>/propylene carbonate electrolyte.

File Name: Supplementary Movie 2

Description: The pseudocapacitive IPMC actuator bent to the left and right under the constant voltage of 1.8 V and -1.8 V, respectively.
